# Supplementary material for: The electronic transport properties of transition-metal dichalcogenide lateral heterojunctions
Source: Royal Society of Chemistry journal article supplement (doi:10.1039/c6tc04327e), 2016-01-01
Supplement: c6tc04327e1.pdf [file c6tc04327e1.pdf]

## Supplementary Information for

### The electronic transport properties of transition-metal dichalcogenides lateral heterojunctions

Yipeng An,<sup>\*a</sup> Mengjun Zhang,<sup>a</sup> Dapeng Wu,<sup>b</sup> Zhaoming Fu<sup>ac</sup> and Kun Wang<sup>d</sup>

*<sup>a</sup>College of Physics and Materials Science, Henan Normal University, Xinxiang 453007, China.*

*E-mail address: ypan@htu.edu.cn.*

*<sup>b</sup>School of Chemistry and Chemical Engineering, Henan Normal University, Xinxiang 453007, China*

*<sup>c</sup>Beijing National Laboratory for Condensed Matter Physics, Institute of Physics, Chinese Academy of Sciences, Beijing 100190, China*

*<sup>d</sup>Department of Physics and Astronomy & NanoSEC, University of Georgia, Athens, GA 30602, USA*

## 1 Geometrical structures optimization

We first optimize the unit cell of  $\text{MoS}_2$ ,  $\text{WS}_2$ ,  $\text{MoS}_2\text{-WS}_2\text{ud}$ , and  $\text{WS}_2\text{-MoS}_2\text{ud}$  by LBFGS method. The k-points grid  $1 \times 1 \times 51$  is used to sample the Brillouin zone of the unit cell in the X, Y, and Z direction (periodic direction), respectively. The convergence criterion is that the absolute value of force acting on each atom is less than  $0.01 \text{ eV/\AA}$ .

The two-probe structures can be obtained directly from their optimized unit cell for  $\text{MoS}_2$ ,  $\text{WS}_2$ ,  $\text{MoS}_2\text{-WS}_2\text{ud}$ , and  $\text{WS}_2\text{-MoS}_2\text{ud}$  nanojunctions. While for  $\text{MoS}_2\text{-WS}_2\text{lr}$ ,  $\text{MoS}_2\backslash\text{WS}_2$ , and  $\text{MoS}_2/\text{WS}_2$  nanojunctions, we first obtained their relaxed structures by Bulk Rigid Relaxation (BRR) method. Namely, we extract the central scattering region bulk and relax it with “Rigid” constraints on the atoms belonging to the electrode extensions. These  $\text{MoS}_2\text{-WS}_2\text{lr}$ ,  $\text{MoS}_2\backslash\text{WS}_2$ , and  $\text{MoS}_2/\text{WS}_2$  nanojunctions are then reassembled from the relaxed bulk. This is a computationally efficient approach and will usually capture a large fraction of the required geometry relaxation.

## 2 Width effect

The  $\text{WS}_2\text{-MoS}_2\text{ud}$  lateral heterojunctions with finite width (6, 8, and 10 zigzag chains) have very similar band structures and  $I\text{-}V$  curves, as shown in Fig. S1. The ribbon width palys little influence on their electronic transport properties.

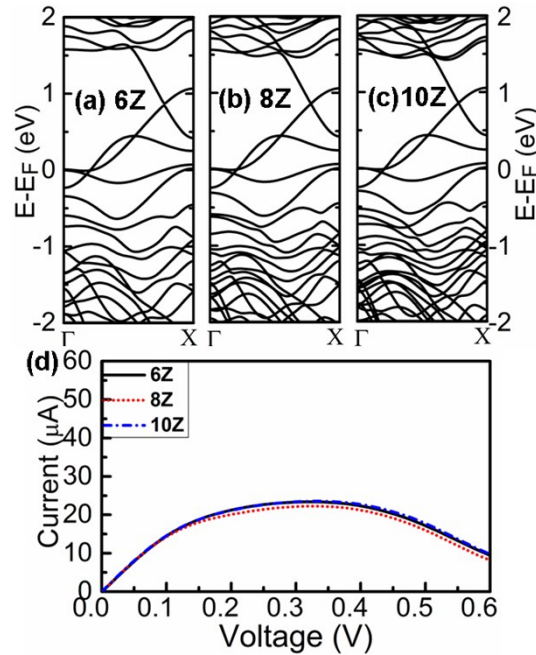

**Fig. S1** (a)-(c) refer to the band structures of  $\text{WS}_2\text{-MoS}_2\text{ud}$  with 6, 8, and 10 zigzag chains. (d) refers to their almost coincided  $I\text{-}V$  curves.

### 3 The length of central scattering region

In the present work, the length of the central scattering region is about 25.3 Å, which plays little influence on the electronic transport of such MoS<sub>2</sub>–WS<sub>2</sub> lateral heterojunctions. Take WS<sub>2</sub>–MoS<sub>2</sub>ud lateral heterojunctions as an example, when the length of central scattering region is increased to 31.6 and 37.9 Å, their  $I$ – $V$  curves are almost coincided, as shown in Fig. S2.

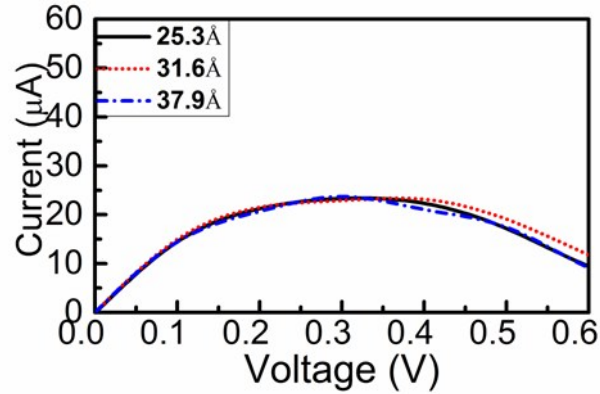

**Fig. S2.** The  $I$ – $V$  curves of WS<sub>2</sub>–MoS<sub>2</sub>ud heterojunctions with different lengths for the central scattering region.

### 4 The eigenstates of MoS<sub>2</sub>–WS<sub>2</sub>lr and MoS<sub>2</sub>–WS<sub>2</sub>ud heterojunction

Although these MoS<sub>2</sub>–WS<sub>2</sub> lateral heterojunctions have different interfaces, they have the very similar transmission eigenstates distributions. As shown in Fig. S3, the transmission eigenstates of MoS<sub>2</sub>–WS<sub>2</sub>lr and MoS<sub>2</sub>–WS<sub>2</sub>ud heterojunctions are the same to that of WS<sub>2</sub>–MoS<sub>2</sub>ud heterojunction (see Fig. 5 of the paper).

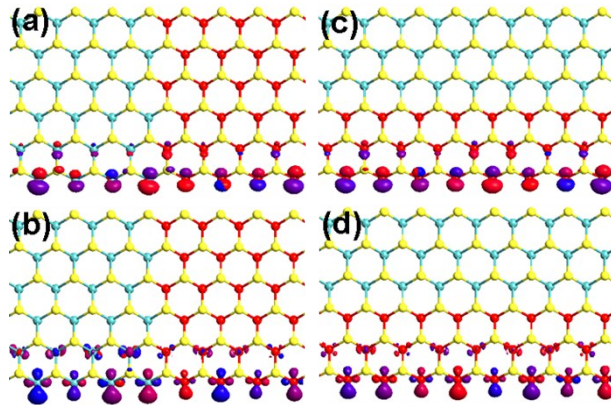

**Fig. S3.** (a) and (b) refer to the both transmission eigenstates of the MoS<sub>2</sub>–WS<sub>2</sub>lr heterojunction at 0.15 eV under the bias of 0.3 V. (c) and (d) refer to the both transmission eigenstates of the MoS<sub>2</sub>–WS<sub>2</sub>ud heterojunction at 0.15 eV under the bias of 0.3 V.
